# Supplementary material for: Indirect Access to Carbene Adducts of Bismuth- and Antimony-Substituted Phosphaketene and Their Unusual Thermal Transformation to Dipnictines and [(NHC)2OCP][OCP]
Source: PubMed Central journal article supplement (PMC8277130; doi:10.1021/acs.inorgchem.0c03683), 2021-03-09
Supplement: ic0c03683_si_001.pdf [file ic0c03683_si_001.pdf]

# Indirect Access to Carbene Adducts of Bismuth and Antimony Substituted Phosphaketene and their Unusual Thermal Transformation to Dipnictines and [(NHC)<sub>2</sub>OCP][OCP]

Jacob E. Walley,<sup>a</sup> Levi S. Warring,<sup>a</sup> Erik Kertész,<sup>b</sup> Guocang Wang,<sup>a</sup> Diane A. Dickie,<sup>a</sup> Zoltán Benkő,<sup>b\*</sup> Robert J. Gilliard, Jr.<sup>a\*</sup>

<sup>a</sup>Department of Chemistry, University of Virginia, 409 McCormick Rd, PO Box 400319, Charlottesville, USA

<sup>b</sup>Department of Inorganic and Analytical Chemistry, Budapest University of Technology and Economics, Szent Gellért tér 4, H-1111 Budapest, Hungary

\*To whom correspondence should be addressed: zbenko@mail.bme.hu; rjg8s@virginia.edu

## Supporting Information

### Table of Contents

|                                                  |     |
|--------------------------------------------------|-----|
| <b>NMR Spectral Data</b> .....                   | S2  |
| <b>IR Spectral Data</b> .....                    | S9  |
| <b>Crystal structure of compound 6</b> .....     | S11 |
| <b>Crystallographic Refinement Details</b> ..... | S12 |
| <b>Computational Details</b> .....               | S13 |
| <b>References</b> .....                          | S34 |

## NMR Spectral Data

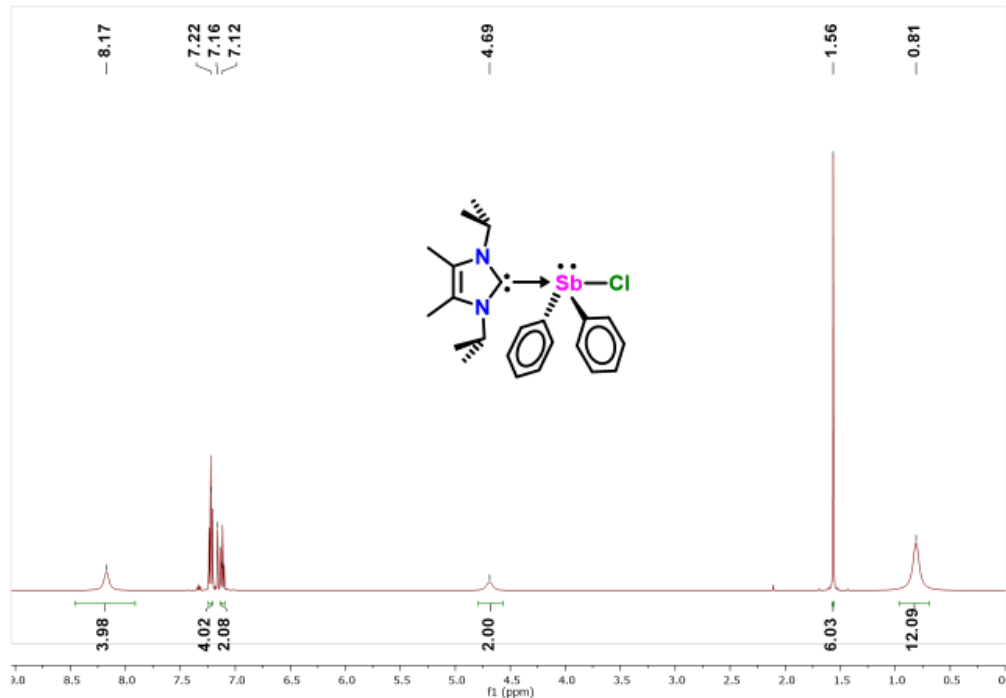

**Figure S1:**  $^1\text{H}$  NMR spectrum (500.13 MHz,  $\text{C}_6\text{D}_6$ , 298 K) of complex **1**.

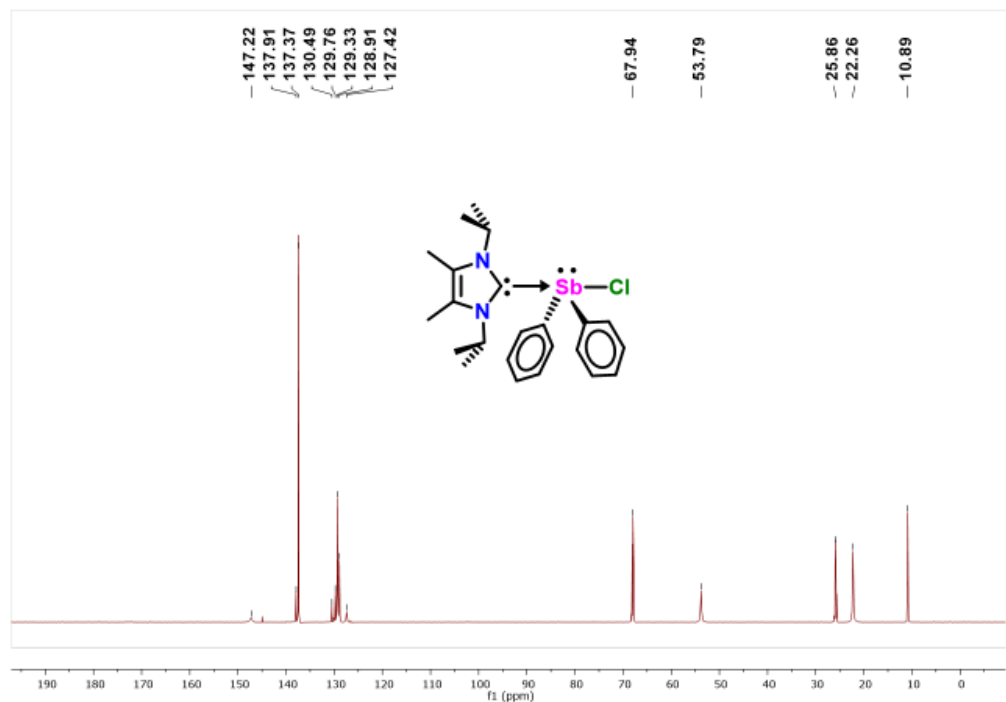

**Figure S2:**  $^{13}\text{C}\{^1\text{H}\}$  NMR spectrum (201.19 MHz,  $\text{C}_6\text{D}_6$ , 298 K) of complex **1**.

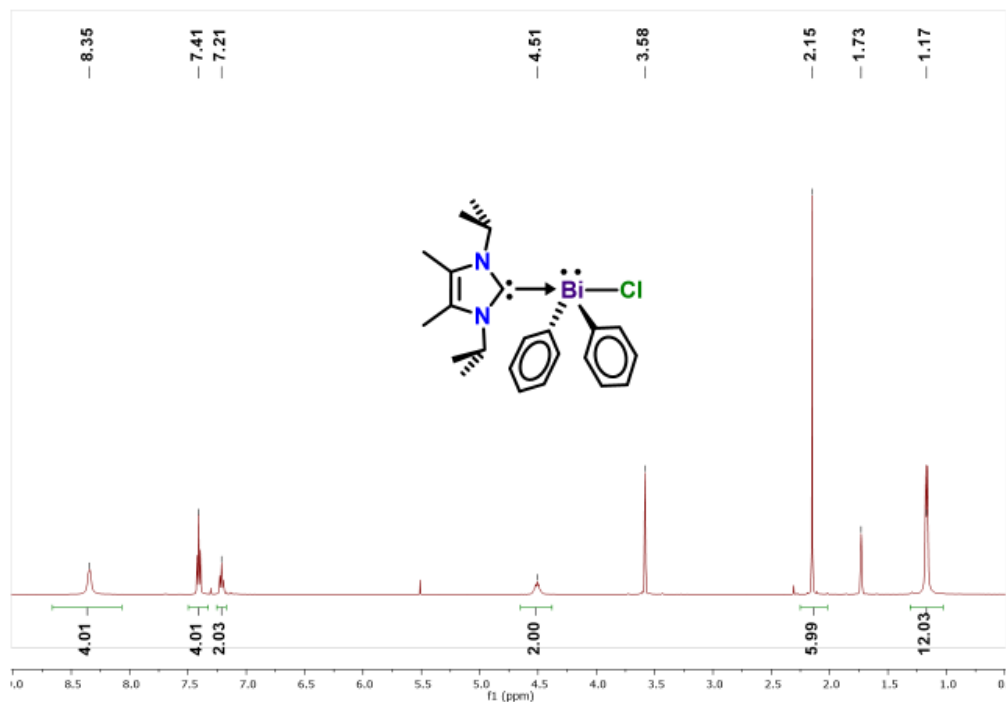

**Figure S3:**  $^1\text{H}$  NMR spectrum (500.13 MHz,  $\text{C}_6\text{D}_6$ , 298 K) of complex **2**.

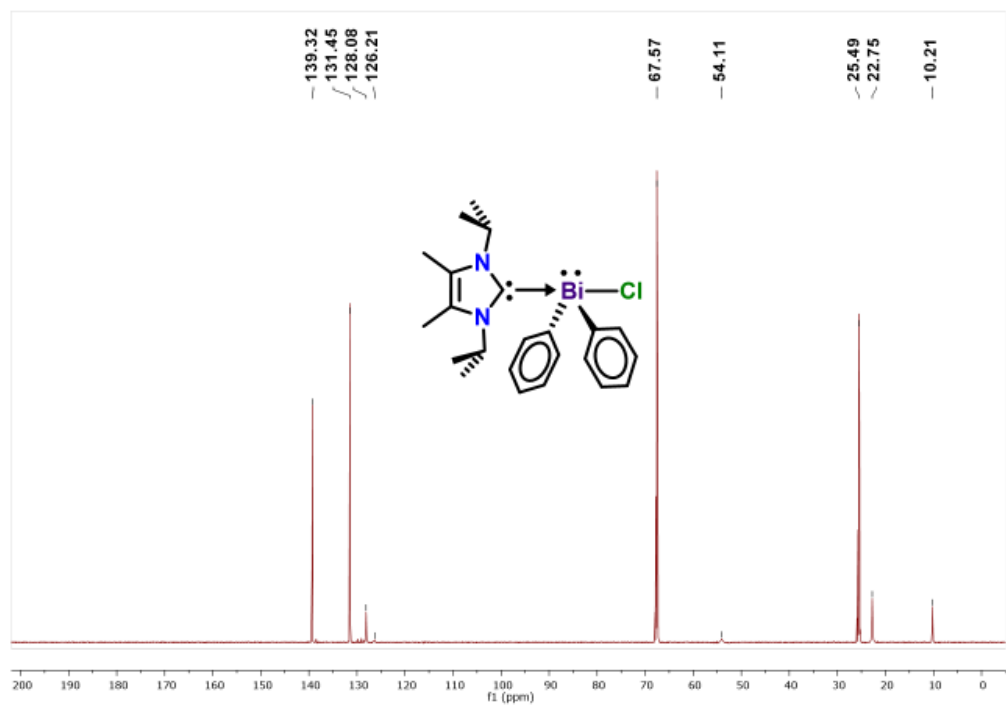

**Figure S4:**  $^{13}\text{C}\{^1\text{H}\}$  NMR spectrum (201.19 MHz,  $\text{C}_6\text{D}_6$ , 298 K) of complex **2**.

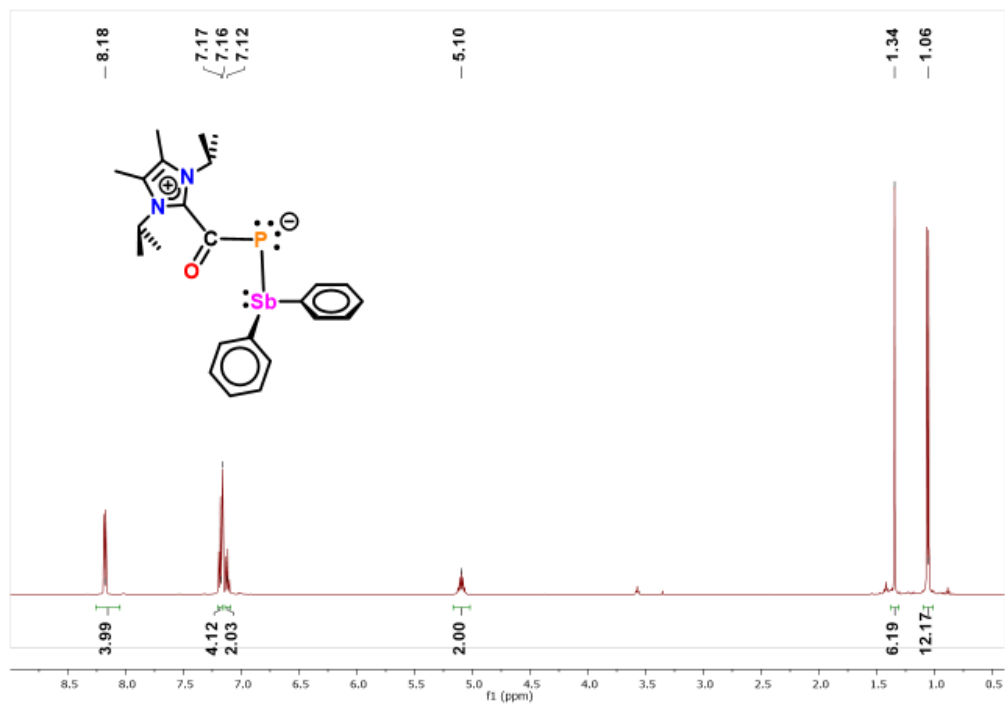

**Figure S5:**  $^1\text{H}$  NMR spectrum (500.13 MHz,  $\text{C}_6\text{D}_6$ , 298 K) of complex 3.

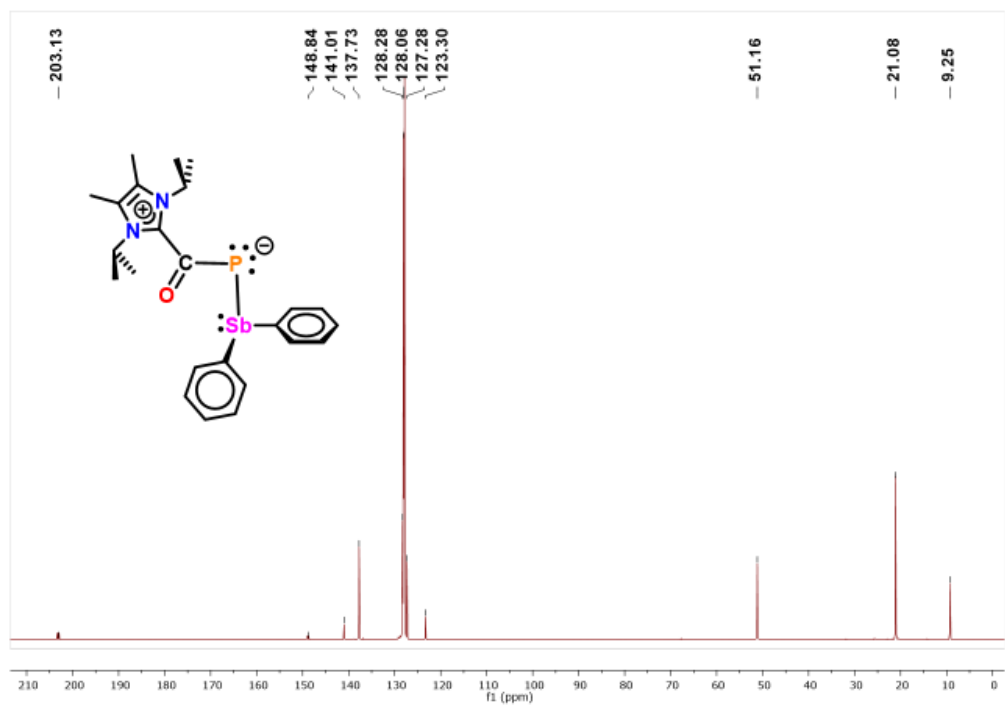

**Figure S6:**  $^{13}\text{C}\{^1\text{H}\}$  NMR spectrum (201.193 MHz,  $\text{C}_6\text{D}_6$ , 298 K) of complex 3.

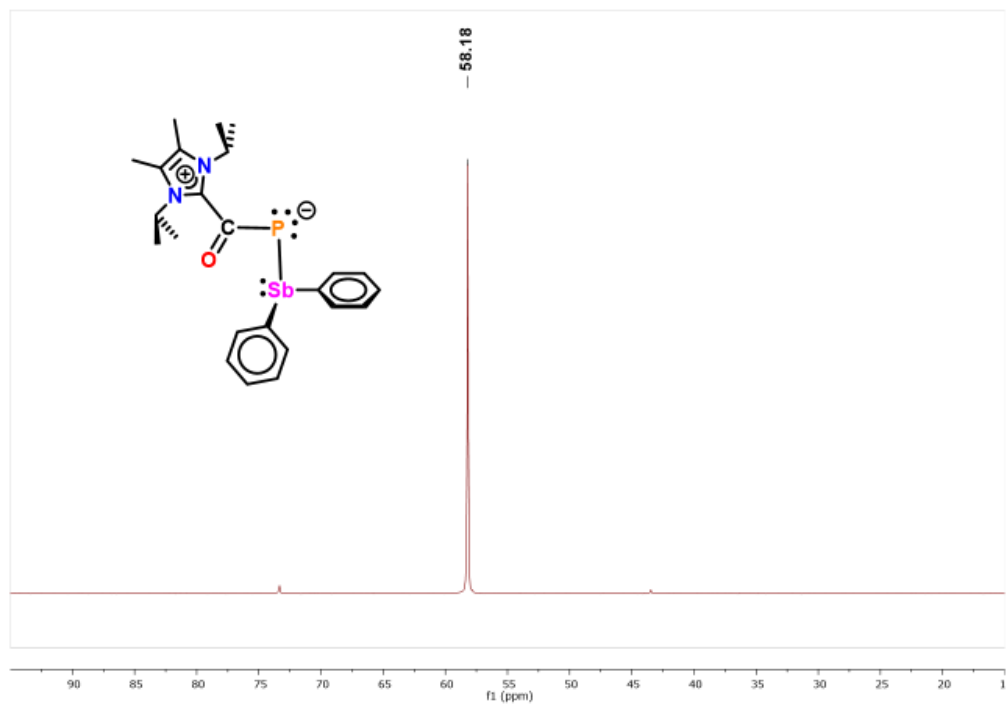

**Figure S7:**  $^{31}\text{P}\{^1\text{H}\}$  NMR spectrum (202.46 MHz, 298 K) of complex 3.

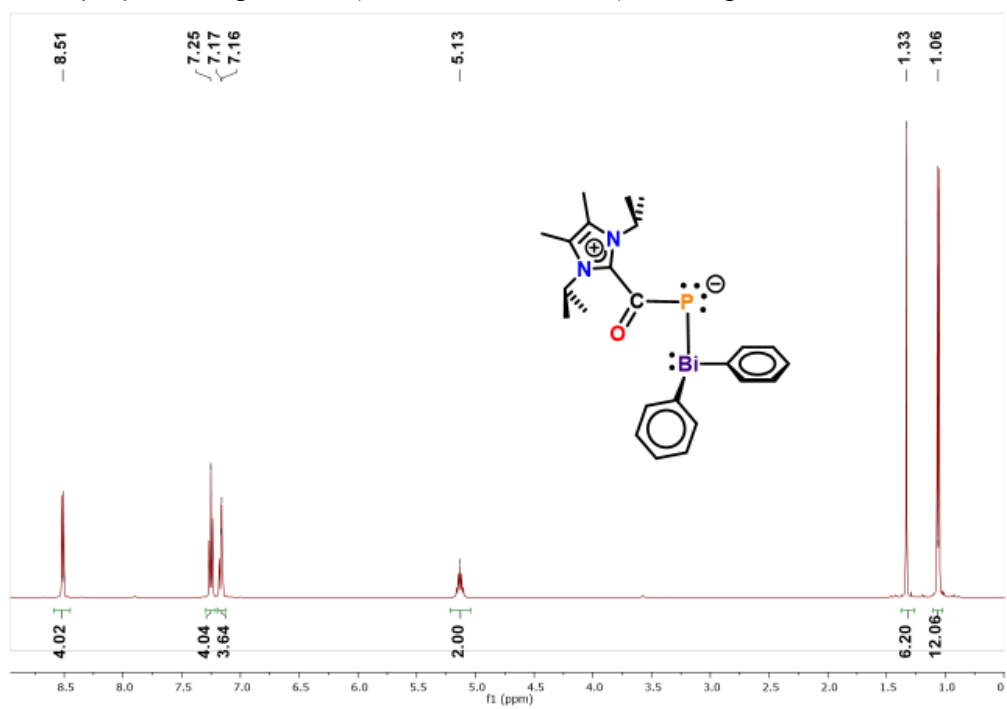

**Figure S8:**  $^1\text{H}$  NMR spectrum (500.13 MHz,  $\text{C}_6\text{D}_6$ , 298 K) of complex 4.

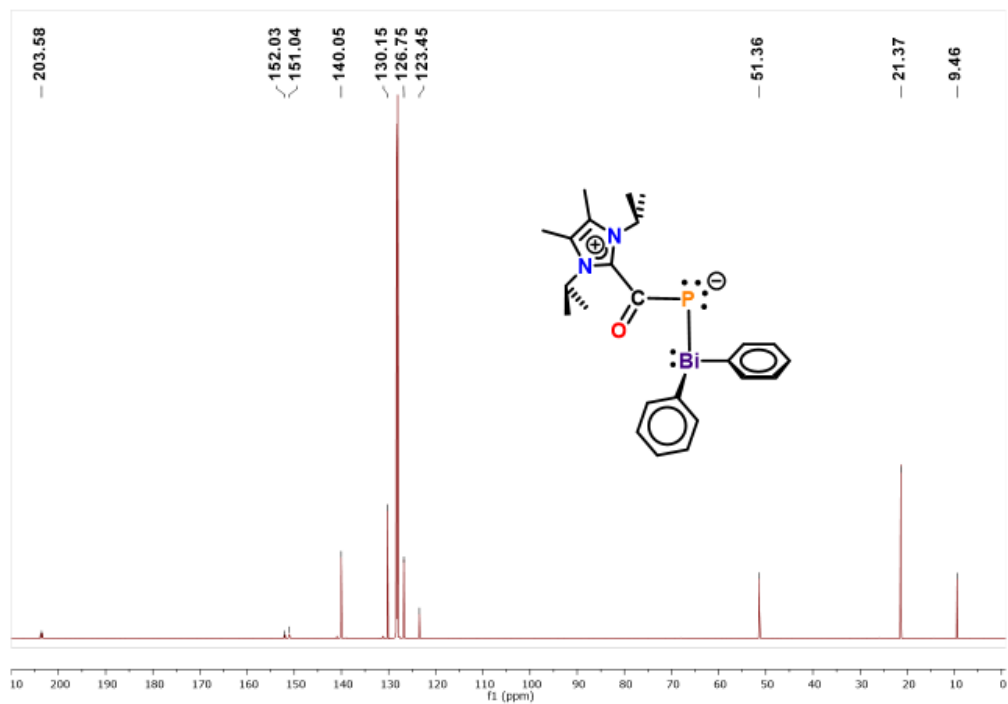

**Figure S9:**  $^{13}\text{C}\{^1\text{H}\}$  NMR spectrum (201.193 MHz,  $\text{C}_6\text{D}_6$ , 298 K) of complex 4.

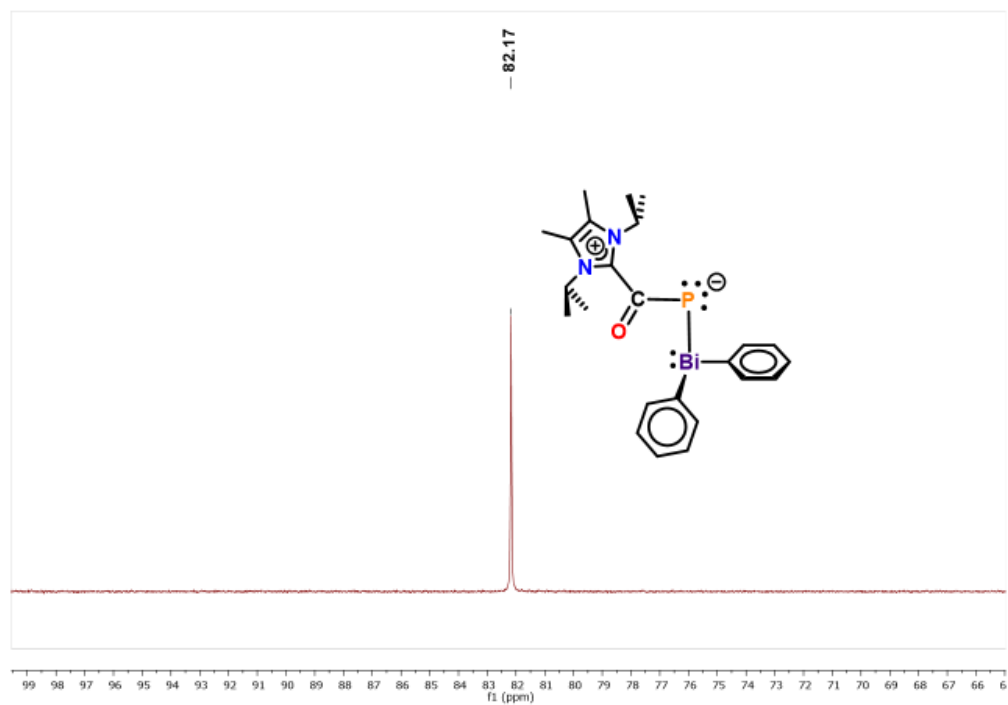

**Figure S10:**  $^{31}\text{P}\{^1\text{H}\}$  NMR spectrum (202.46 MHz, 298 K) of complex 4.

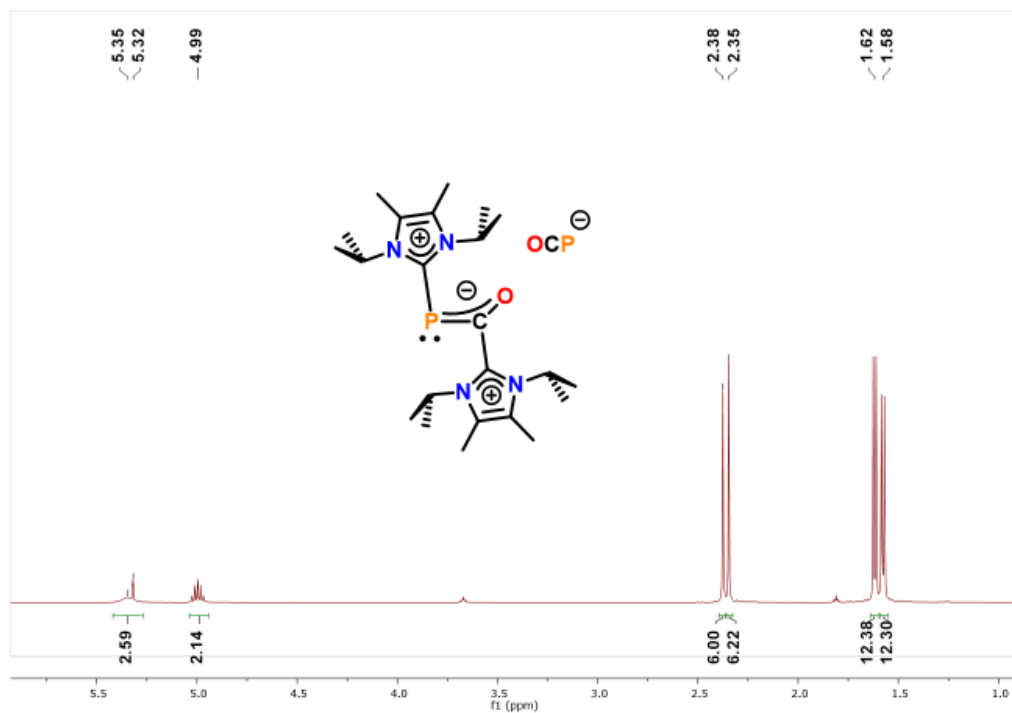

**Figure S11:**  $^1\text{H}$  NMR spectrum (500.13 MHz,  $\text{C}_6\text{D}_6$ , 298 K) of complex **5**.

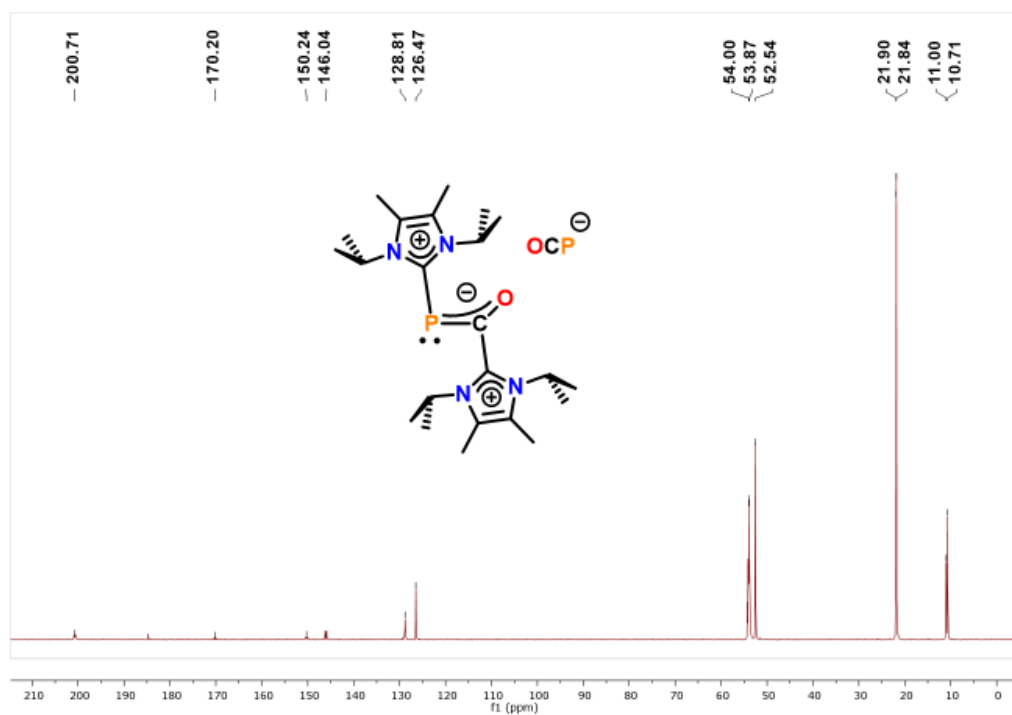

**Figure S12:**  $^{13}\text{C}\{^1\text{H}\}$  NMR spectrum (201.193 MHz,  $\text{C}_6\text{D}_6$ , 298 K) of complex **5**.

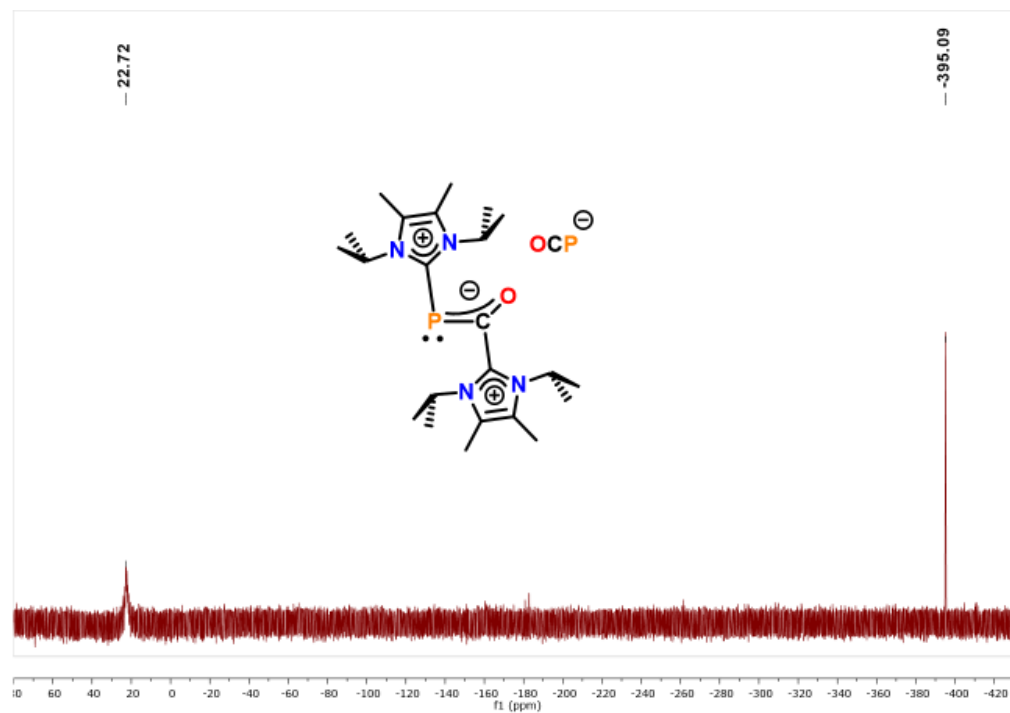

**Figure S13:** <sup>31</sup>P{<sup>1</sup>H} NMR spectrum (242.94 MHz, 298 K) of complex 5.

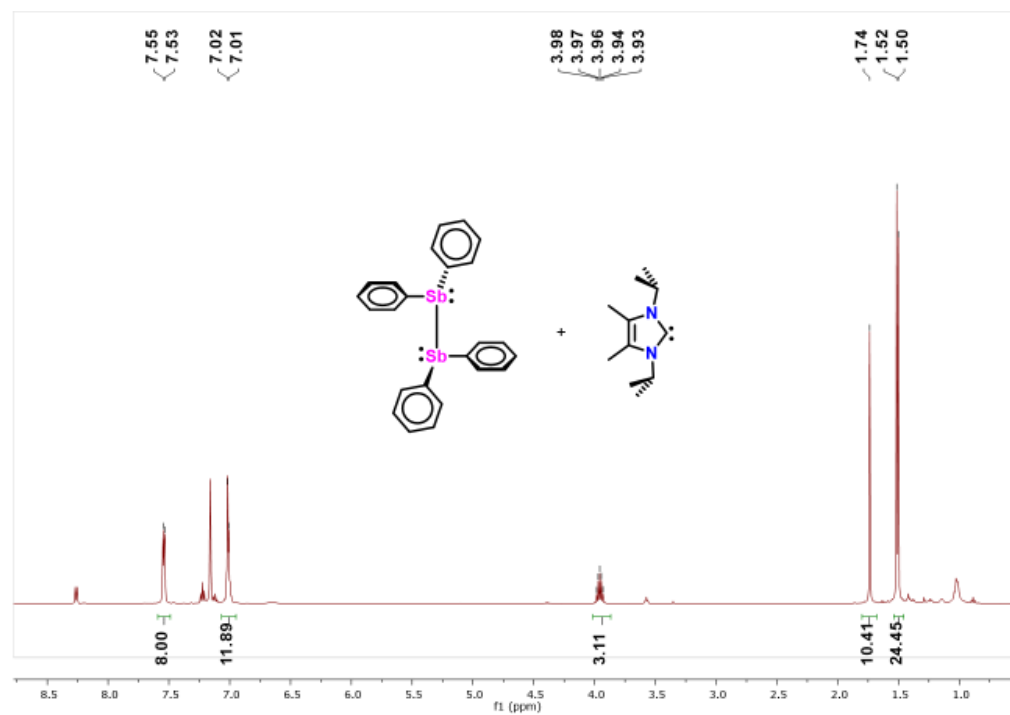

**Figure S14:** <sup>1</sup>H NMR spectrum (500.13 MHz, C<sub>6</sub>D<sub>6</sub>, 298 K) of the reaction mixture after heating compound 3 at 90 °C for 24 hours.



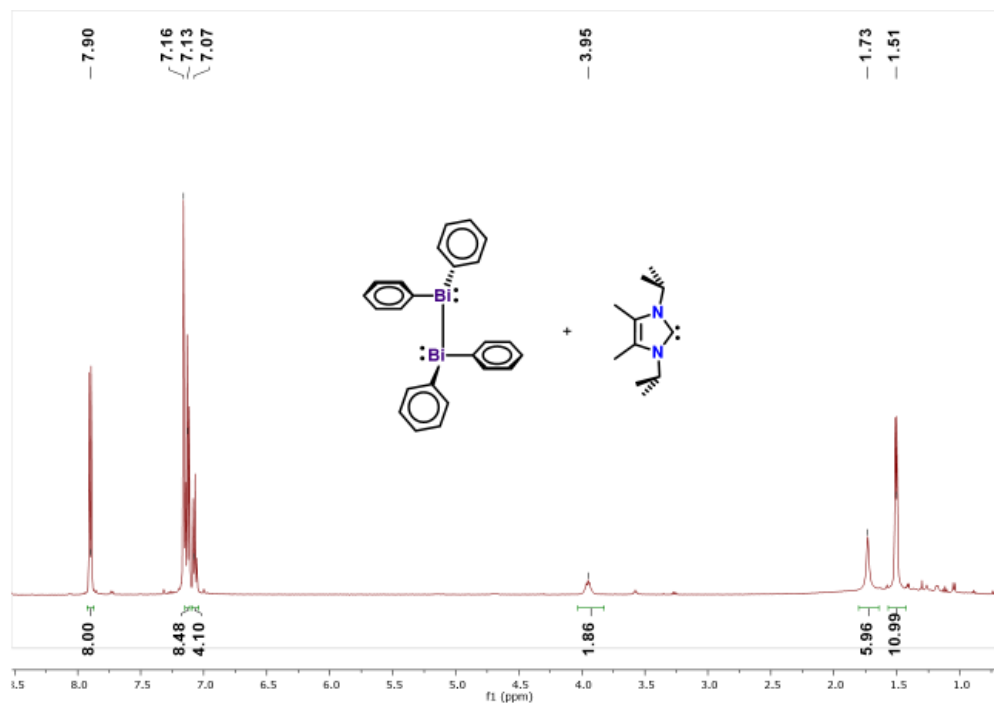

**Figure S15:**  $^1\text{H}$  NMR spectrum (500.13 MHz,  $\text{C}_6\text{D}_6$ , 298 K) of the reaction mixture after heating compound **4** at 70 °C for 3 hours.

### IR Spectral Data

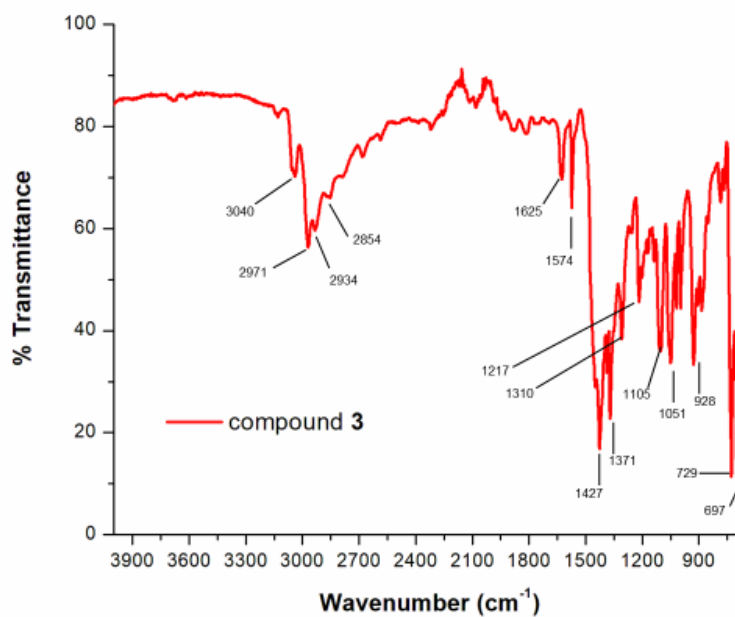

**Figure S16:** FT-IR Spectrum of compound **3**.

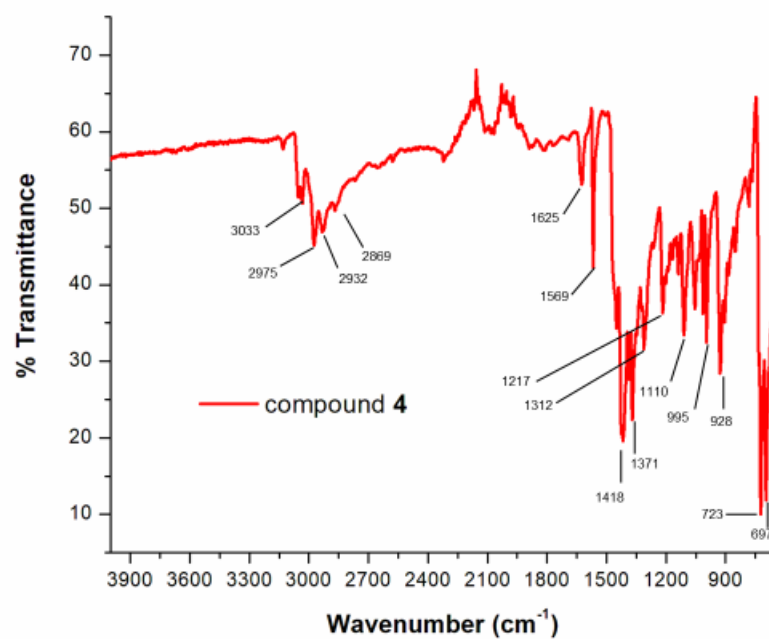

**Figure S17:** FT-IR Spectrum of compound 4.

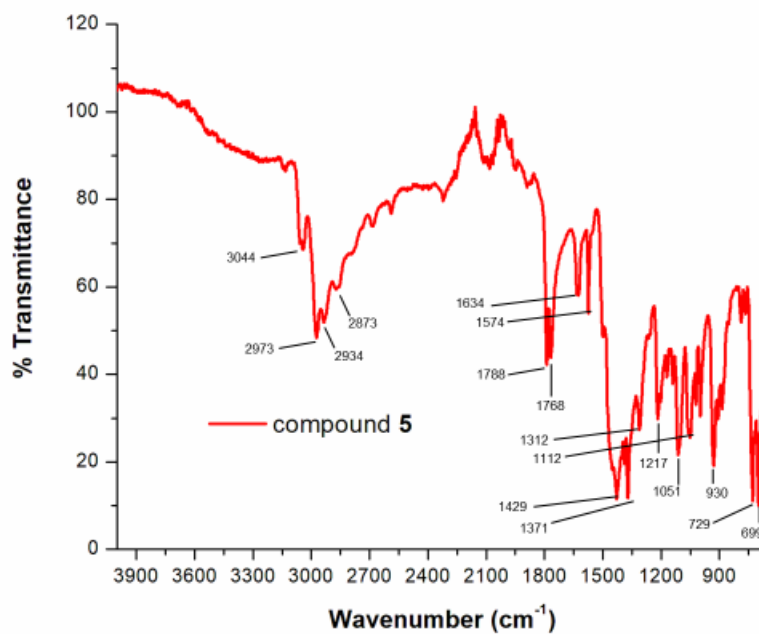

**Figure S18:** FT-IR Spectrum of compound 5.

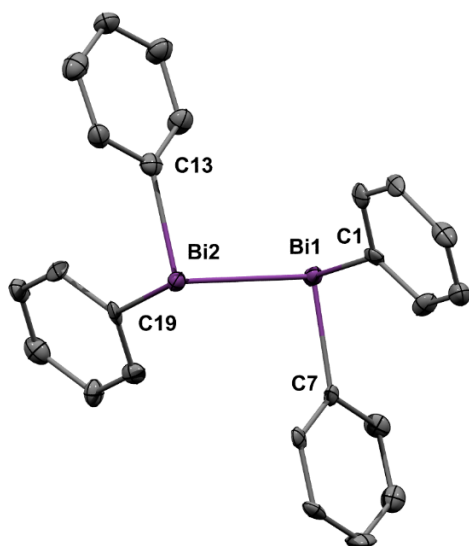

**Figure S19:** X-ray crystal structure of **6**. Ellipsoids represent 50% probability and all hydrogen atoms have been omitted for clarity. Selected bond lengths (Å) and angles (°): Bi1–Bi2: 2.9867(7); Bi1–C1: 2.274(13); Bi1–C7: 2.267(12); Bi2–C13: 2.261(13); Bi2–C19: 2.261(12). C1–Bi1–Bi2: 90.5(3); C7–Bi1–Bi2: 94.0(3); C7–Bi1–C1: 92.3(4); Bi1–Bi2–C13: 95.0(3); Bi1–Bi2–C19: 91.9(3); C13–Bi2–C19: 93.0(5).

## Crystallographic Refinement Details

Table S1. Crystallographic data for 1-6.

|                                        | 1                                                   | 2                                                  | 3                                                   | 4                                                   | 5                                                                            | 6                                               |
|----------------------------------------|-----------------------------------------------------|----------------------------------------------------|-----------------------------------------------------|-----------------------------------------------------|------------------------------------------------------------------------------|-------------------------------------------------|
| CCDC                                   | 1962839                                             | 1962840                                            | 1962841                                             | 1962842                                             | 1976639                                                                      | 1962843                                         |
| Chemical formula                       | C <sub>23</sub> H <sub>30</sub> ClN <sub>2</sub> Sb | C <sub>23</sub> H <sub>30</sub> BiClN <sub>2</sub> | C <sub>24</sub> H <sub>30</sub> N <sub>2</sub> OPsb | C <sub>24</sub> H <sub>30</sub> BiN <sub>2</sub> OP | C <sub>24</sub> H <sub>38</sub> N <sub>4</sub> O <sub>2</sub> P <sub>2</sub> | C <sub>24</sub> H <sub>20</sub> Bi <sub>2</sub> |
| FW (g/mol)                             | 491.69                                              | 578.92                                             | 515.22                                              | 602.45                                              | 476.52                                                                       | 726.36                                          |
| T (K)                                  | 100(2)                                              | 100(2)                                             | 100(2)                                              | 100(2)                                              | 100(2)                                                                       | 100(2)                                          |
| λ (Å)                                  | 1.54178                                             | 0.71073                                            | 1.54178                                             | 1.54178                                             | 0.71073                                                                      | 0.71073                                         |
| Crystal size (mm)                      | 0.063 × 0.086 × 0.134                               | 0.075 × 0.093 × 0.125                              | 0.027 × 0.033 × 0.179                               | 0.046 × 0.049 × 0.088                               | 0.168 × 0.314 × 0.379                                                        | 0.066 × 0.087 × 0.305                           |
| Crystal habit                          | colorless plate                                     | colorless rod                                      | yellow rod                                          | yellow rod                                          | orange block                                                                 | yellow rod                                      |
| Crystal system                         | triclinic                                           | triclinic                                          | triclinic                                           | monoclinic                                          | orthorhombic                                                                 | monoclinic                                      |
| Space group                            | P -1                                                | P -1                                               | P -1                                                | P 2 <sub>1</sub> /c                                 | F dd2                                                                        | P2 <sub>1</sub>                                 |
| a (Å)                                  | 9.9641(14)                                          | 9.9533(12)                                         | 11.3208(7)                                          | 11.2834(3)                                          | 17.553(2)                                                                    | 5.9018(6)                                       |
| b (Å)                                  | 10.2681(16)                                         | 10.1962(12)                                        | 13.4788(9)                                          | 18.2355(5)                                          | 22.829(2)                                                                    | 21.746(2)                                       |
| c (Å)                                  | 10.9350(14)                                         | 11.0990(14)                                        | 17.8244(12)                                         | 23.2146(6)                                          | 13.3554(15)                                                                  | 16.0512(16)                                     |
| α (°)                                  | 90.719(10)                                          | 91.596(4)                                          | 92.540(4)                                           | 90                                                  | 90                                                                           | 90                                              |
| β (°)                                  | 96.231(9)                                           | 95.821(4)                                          | 108.009(4)                                          | 95.508(2)                                           | 90                                                                           | 92.145(3)                                       |
| γ (°)                                  | 93.539(11)                                          | 93.214(4)                                          | 111.776(4)                                          | 90                                                  | 90                                                                           | 90                                              |
| V (Å <sup>3</sup> )                    | 1109.8(3)                                           | 1118.2(2)                                          | 2362.8(3)                                           | 4754.5(2)                                           | 5351.7(10)                                                                   | 2058.5(4)                                       |
| Z                                      | 2                                                   | 2                                                  | 4                                                   | 8                                                   | 8                                                                            | 4                                               |
| ρ <sub>calc</sub> (g/cm <sup>3</sup> ) | 1.471                                               | 1.719                                              | 1.448                                               | 1.683                                               | 1.183                                                                        | 2.344                                           |
| μ (mm <sup>-1</sup> )                  | 11.024                                              | 8.013                                              | 10.023                                              | 15.313                                              | 0.189                                                                        | 17.078                                          |
| F(000)                                 | 500                                                 | 564                                                | 1048                                                | 2352                                                | 2048                                                                         | 1320                                            |
| θ range (°)                            | 4.07 - 68.38°                                       | 3.69 - 51.48                                       | 2.65 - 68.53                                        | 3.09 - 68.39                                        | 2.11 to 25.35                                                                | 2.53 - 56.70                                    |
| Index ranges                           | -11 ≤ h ≤ 11<br>-12 ≤ k ≤ 12<br>-13 ≤ l ≤ 12        | -12 ≤ h ≤ 12<br>-12 ≤ k ≤ 12<br>-13 ≤ l ≤ 11       | -13 ≤ h ≤ 13<br>-16 ≤ k ≤ 16<br>-19 ≤ l ≤ 21        | -10 ≤ h ≤ 13<br>-21 ≤ k ≤ 21<br>-27 ≤ l ≤ 27        | -20 ≤ h ≤ 21<br>-27 ≤ k ≤ 26<br>-15 ≤ l ≤ 16                                 | -7 ≤ h ≤ 7<br>-28 ≤ k ≤ 28<br>-21 ≤ l ≤ 21      |
| Reflns coll.                           | 14729                                               | 18501                                              | 34781                                               | 37832                                               | 10231                                                                        | 36083                                           |
| Ind. reflns                            | 4033 [R <sub>int</sub> = 0.0593]                    | 4264 [R <sub>int</sub> = 0.0725]                   | 8638 [R <sub>int</sub> = 0.0681]                    | 8710 [R <sub>int</sub> = 0.0899]                    | 2390 [R(int) = 0.0350]                                                       | 10223 [R <sub>int</sub> = 0.0667]               |
| Data / restraints / parameters         | 4033 / 0 / 250                                      | 4264/0/250                                         | 8638 / 0 / 550                                      | 8710 / 0 / 559                                      | 2390 / 23 / 218                                                              | 10223/1/469                                     |
| Goodness-of-fit on F <sup>2</sup>      | 1.053                                               | 1.034                                              | 1.057                                               | 1.012                                               | 1.079                                                                        | 1.009                                           |
| R <sub>1</sub> [I > 2σ(I)]             | 0.0338                                              | 0.0370                                             | 0.0604                                              | 0.0411                                              | 0.0519                                                                       | 0.0364                                          |
| wR <sub>2</sub> [all data]             | 0.0875                                              | 0.0673                                             | 0.1643                                              | 0.0957                                              | 0.1414                                                                       | 0.0705                                          |

## Computational Details

The computations were carried out with the Gaussian 09 suite of programs.<sup>1</sup> The structures were optimized using the  $\omega$ B97XD functionals. We applied the def2-SVP basis set and we validated the calculations with def2-TZVP basis set implemented in Gaussian 09. At each of the optimized structures vibrational analysis was accomplished to check whether the stationary point located is a minimum or a saddle point of the potential energy hypersurface. We neglected the solvent-effect, because toluene was used as solvent, so the gas-phase computations simulated the reaction-conditions well. For Wiberg Bond Indexes and NPA charges the NBO program version 3.1 was employed.<sup>2</sup> The plotting of the orbitals was carried out with the AVOGADRO program ([www.avogadro.cc](http://www.avogadro.cc)).

**Figure S20.** Chemical structure of NHC-carbene with Cartesian X,Y,Z-coordinates ( $\omega$ b97xd def2-TZVP).

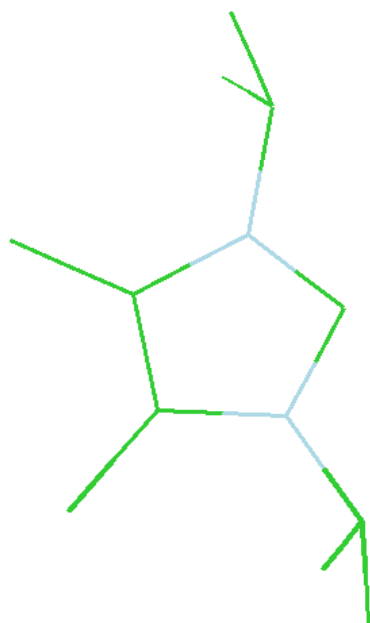

scf done: -540.723559

|   |           |           |           |
|---|-----------|-----------|-----------|
| C | 0.004640  | -0.001670 | 0.004960  |
| C | 0.004648  | 0.002192  | 1.359943  |
| N | 1.342368  | 0.002239  | 1.744223  |
| C | 2.183472  | -0.008090 | 0.682455  |
| N | 1.342313  | -0.011877 | -0.379312 |
| C | -1.160982 | 0.028810  | 2.287777  |
| C | 1.890975  | -0.055945 | 3.098484  |
| C | 1.406931  | 1.080295  | 3.991267  |
| C | 1.891290  | 0.042113  | -1.733590 |
| C | 1.398154  | -1.090207 | -2.626367 |
| C | -1.161127 | -0.019517 | -0.922910 |
| C | 1.691918  | -1.428165 | 3.731768  |
| C | 1.702969  | 1.415902  | -2.366757 |
| H | 2.958374  | 0.081466  | 2.927466  |
| H | 2.957591  | -0.103706 | -1.562678 |
| H | -2.078915 | 0.180943  | -0.372385 |
| H | -1.079079 | 0.740598  | -1.700236 |
| H | -1.276183 | -0.986920 | -1.415938 |
| H | -1.268784 | 0.997054  | 2.780785  |
| H | -2.080230 | -0.164760 | 1.737223  |
| H | -1.084669 | -0.731895 | 3.065111  |
| H | 2.012469  | -1.132842 | -3.527101 |
| H | 1.478231  | -2.049061 | -2.113131 |
| H | 0.364558  | -0.948352 | -2.942937 |
| H | 2.239471  | 1.464008  | -3.315966 |
| H | 0.652862  | 1.633145  | -2.568407 |
| H | 2.095505  | 2.190177  | -1.707357 |

|   |          |           |          |
|---|----------|-----------|----------|
| H | 2.228094 | -1.480410 | 4.680943 |
| H | 0.640148 | -1.637128 | 3.933509 |
| H | 2.078310 | -2.205549 | 3.072397 |
| H | 2.021857 | 1.118265  | 4.891794 |
| H | 1.494305 | 2.038435  | 3.477886 |
| H | 0.372383 | 0.946542  | 4.308227 |

**Figure S21.** Chemical structure of BiPh<sub>2</sub>PCO with Cartesian X,Y,Z-coordinates (ωb97xd def2-TZVP with contour value 0,05).

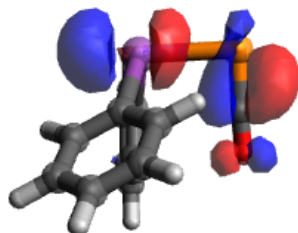

scf done: -1132.699499

|    |           |           |           |
|----|-----------|-----------|-----------|
| C  | 0.178933  | 0.034519  | -0.059512 |
| C  | 0.084326  | -0.111317 | 1.322381  |
| C  | 1.249800  | -0.245630 | 2.067207  |
| C  | 2.489362  | -0.225693 | 1.442317  |
| C  | 2.574975  | -0.073909 | 0.067404  |
| C  | 1.417052  | 0.056237  | -0.684472 |
| Bi | -1.966500 | -0.214018 | 2.227461  |
| C  | -2.585568 | 1.815068  | 1.510055  |
| C  | -3.942077 | 2.128220  | 1.547999  |
| C  | -4.394364 | 3.361651  | 1.102892  |
| C  | -3.491346 | 4.292874  | 0.612711  |
| C  | -2.139272 | 3.989494  | 0.572876  |
| C  | -1.686702 | 2.756536  | 1.020318  |



|   |           |           |           |
|---|-----------|-----------|-----------|
| P | -1.345979 | 0.381058  | 4.741081  |
| H | -4.663535 | 1.412952  | 1.930364  |
| H | -5.451233 | 3.595142  | 1.139115  |
| H | -3.840973 | 5.256332  | 0.263527  |
| H | -1.430604 | 4.716165  | 0.195225  |
| H | -0.626336 | 2.538060  | 0.988784  |
| H | 1.199208  | -0.355511 | 3.144630  |
| H | 3.390247  | -0.324123 | 2.035175  |
| H | 3.542460  | -0.052996 | -0.418274 |
| H | 1.477160  | 0.178728  | -1.758832 |
| H | -0.713710 | 0.151040  | -0.665901 |
| C | -0.613785 | 1.767891  | 4.205453  |
| O | -0.086683 | 2.742549  | 3.887146  |

**Table S2.** Bond length and Wiberg-bond index of characteristic bonds.

| Bond | Bond lengths (Å) | Wiberg-bond index |
|------|------------------|-------------------|
| Bi-P | 2,657            | 0,76              |
| P-C  | 1,657            | 1,72              |
| C-O  | 1,153            | 1,93              |

**Table S3.** Natural charges of main atoms.

| Atom | Charge |
|------|--------|
| Bi   | +1,01  |
| P    | -0,14  |
| C    | +0,31  |
| O    | -0,47  |

**Figure S22.** Chemical structure of SbPh<sub>2</sub>PCO with Cartesian X,Y,Z-coordinates (ωb97xd def2-TZVP with contour value 0,05).

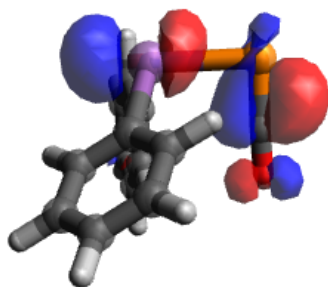

scf done: -1158.319675

|    |           |           |           |
|----|-----------|-----------|-----------|
| C  | 0.193646  | 0.238025  | -0.004771 |
| C  | 0.084726  | -0.027820 | 1.358975  |
| C  | 1.233279  | -0.352294 | 2.073471  |
| C  | 2.467765  | -0.397376 | 1.441994  |
| C  | 2.567406  | -0.121877 | 0.087293  |
| C  | 1.427954  | 0.196457  | -0.635619 |
| Sb | -1.871697 | -0.082962 | 2.249146  |
| C  | -2.548762 | 1.818484  | 1.519423  |
| C  | -3.925804 | 2.028303  | 1.483993  |
| C  | -4.447589 | 3.228215  | 1.025439  |
| C  | -3.595026 | 4.231699  | 0.591901  |
| C  | -2.223014 | 4.032668  | 0.621781  |
| C  | -1.701207 | 2.833112  | 1.082503  |

|   |           |           |           |
|---|-----------|-----------|-----------|
| P | -1.299823 | 0.503007  | 4.675085  |
| H | -4.606698 | 1.251802  | 1.816903  |
| H | -5.519928 | 3.376755  | 1.003091  |
| H | -3.999388 | 5.168941  | 0.230606  |
| H | -1.553647 | 4.815149  | 0.286603  |
| H | -0.627220 | 2.694879  | 1.099557  |
| H | 1.173738  | -0.561292 | 3.135514  |
| H | 3.353614  | -0.646825 | 2.012596  |
| H | 3.531622  | -0.152443 | -0.404294 |
| H | 1.498569  | 0.415679  | -1.693793 |
| H | -0.684492 | 0.496566  | -0.586690 |
| C | -0.452451 | 1.828004  | 4.143145  |
| O | 0.149280  | 2.756460  | 3.823278  |

**Table S4.** Bond length and Wiberg-bond index of characteristic bonds.

| Bond | Bond lengths (Å) | Wiberg-bond index |
|------|------------------|-------------------|
| Sb-P | 2,551            | 0,79              |
| P-C  | 1,662            | 1,70              |
| C-O  | 1,152            | 1,94              |

**Table S5.** Natural charges of main atoms.

| Atom | Charge |
|------|--------|
| Sb   | +0,97  |
| P    | -0,13  |
| C    | +0,32  |
| O    | -0,46  |

**Figure S23.** Chemical structure of NHC-BiPh<sub>2</sub>PCO complex with cartesian X,Y,Z-coordinates (ωb97xd def2-TZVP).

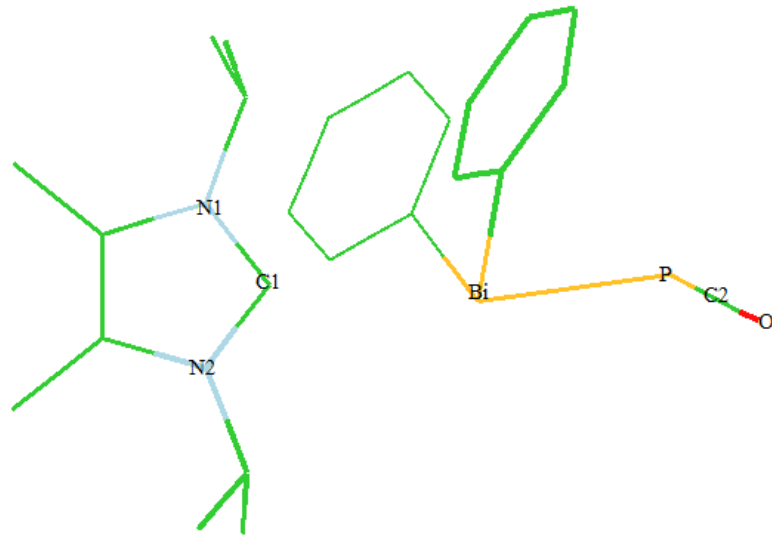

scf done: -1673.457288

|    |           |           |           |
|----|-----------|-----------|-----------|
| N  | 2.182473  | 0.937557  | -0.565611 |
| C  | 1.576450  | -0.266264 | -0.574962 |
| N  | 2.590499  | -1.157322 | -0.549933 |
| C  | 3.825456  | -0.520790 | -0.507149 |
| C  | 3.563509  | 0.809505  | -0.521955 |
| C  | 2.326610  | -2.599586 | -0.542490 |
| C  | 2.553637  | -3.211636 | 0.833441  |
| C  | 5.149227  | -1.203330 | -0.474701 |
| C  | 4.528514  | 1.942728  | -0.472558 |
| C  | 1.403970  | 2.179281  | -0.676816 |
| C  | 1.521830  | 2.784536  | -2.069252 |
| C  | 3.060196  | -3.343054 | -1.651566 |
| C  | 1.702773  | 3.177986  | 0.431593  |
| Bi | -1.020488 | -0.897046 | 0.264061  |
| P  | -3.513234 | -0.890805 | 1.504627  |

|   |           |           |           |
|---|-----------|-----------|-----------|
| C | -4.108282 | -1.534845 | 0.115626  |
| O | -4.548537 | -1.987687 | -0.859959 |
| C | -1.663234 | 0.519447  | -1.371505 |
| C | -1.066932 | 0.381312  | -2.621475 |
| C | -1.446876 | 1.187232  | -3.684817 |
| C | -2.423988 | 2.154316  | -3.506657 |
| C | -3.030146 | 2.295177  | -2.268039 |
| C | -2.660921 | 1.473747  | -1.211393 |
| C | -0.381183 | 0.575578  | 1.853997  |
| C | 0.767682  | 0.285553  | 2.583768  |
| C | 1.187883  | 1.112894  | 3.615805  |
| C | 0.464577  | 2.254704  | 3.925131  |
| C | -0.677769 | 2.558576  | 3.200464  |
| C | -1.099793 | 1.720612  | 2.177121  |
| H | 0.376798  | 1.847465  | -0.550920 |
| H | 1.261274  | -2.664819 | -0.760852 |
| H | 5.925344  | -0.487060 | -0.211944 |
| H | 5.182285  | -2.000431 | 0.267596  |
| H | 5.410112  | -1.636354 | -1.441907 |
| H | 4.514355  | 2.439995  | 0.498514  |
| H | 5.538922  | 1.577927  | -0.647522 |
| H | 4.316550  | 2.692776  | -1.233566 |
| H | 2.619365  | -4.333835 | -1.767100 |
| H | 2.963441  | -2.816261 | -2.601407 |
| H | 4.118586  | -3.479430 | -1.432786 |
| H | 2.273041  | -4.265586 | 0.819258  |
| H | 3.597537  | -3.146764 | 1.142242  |

|   |           |           |           |
|---|-----------|-----------|-----------|
| H | 1.942206  | -2.708150 | 1.583087  |
| H | 0.791553  | 3.587797  | -2.174809 |
| H | 2.512078  | 3.203817  | -2.254457 |
| H | 1.306833  | 2.035725  | -2.830519 |
| H | 0.911638  | 3.927886  | 0.448312  |
| H | 1.717884  | 2.687788  | 1.404351  |
| H | 2.647648  | 3.699107  | 0.277817  |
| H | -3.181002 | 1.563511  | -0.265084 |
| H | -3.805417 | 3.038110  | -2.124919 |
| H | -2.720171 | 2.788740  | -4.332846 |
| H | -0.976554 | 1.060912  | -4.652668 |
| H | -0.282396 | -0.352341 | -2.771727 |
| H | -2.006764 | 1.967137  | 1.638443  |
| H | -1.248676 | 3.448415  | 3.436446  |
| H | 0.789351  | 2.905241  | 4.727535  |
| H | 2.081882  | 0.866180  | 4.175838  |
| H | 1.359671  | -0.592805 | 2.347929  |

**Table S6.** Bond length and Wiberg-bond index of characteristic bonds.

| Bond  | Bond lengths<br>(Å) | Wiberg-bond index |
|-------|---------------------|-------------------|
| N1-C1 | 1,348               | 1,28              |
| N2-C1 | 1,350               | 1,27              |
| C1-Bi | 2,801               | 0,26              |
| C2-O  | 1,162               | 1,86              |
| P-C2  | 1,643               | 1,84              |
| Bi-P  | 2,784               | 0,54              |

**Table S7.** Natural charges of main atoms.

| Atom or unit | Charge |
|--------------|--------|
| N1           | -0,37  |
| N2           | -0,38  |
| C1           | +0,14  |
| C2           | +0,26  |
| O            | -0,51  |
| P            | -0,23  |
| Bi           | +1,12  |
| Carbene      | +0,19  |

**Figure S24.** Chemical structure of NHC-SbPh<sub>2</sub>PCO complex with Cartesian X,Y,Z-coordinates (ωb97xd def2-TZVP).

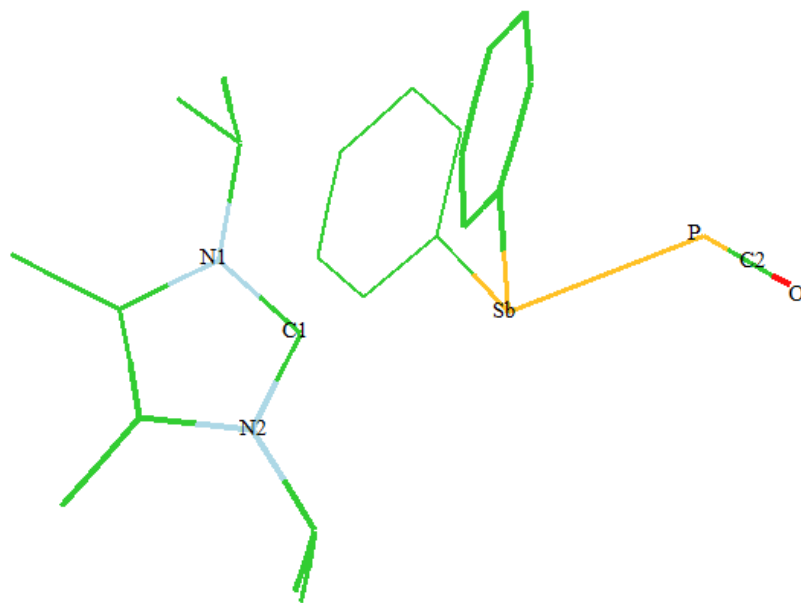

scf done: -1699.073067

|   |           |          |           |
|---|-----------|----------|-----------|
| C | 1.535949  | 2.693747 | 0.189223  |
| C | 0.740867  | 1.891601 | -0.622081 |
| C | -0.331840 | 2.483595 | -1.284227 |
| C | -0.605079 | 3.836049 | -1.142826 |
| C | 0.187398  | 4.619814 | -0.317990 |

|    |           |           |           |
|----|-----------|-----------|-----------|
| C  | 1.256607  | 4.043882  | 0.349880  |
| Sb | 1.100449  | -0.210428 | -1.006004 |
| C  | 1.482640  | -1.077587 | 0.939322  |
| C  | 0.850604  | -2.285872 | 1.220658  |
| C  | 1.080054  | -2.952613 | 2.414737  |
| C  | 1.936571  | -2.406169 | 3.358288  |
| C  | 2.573321  | -1.204453 | 3.090088  |
| C  | 2.359577  | -0.554957 | 1.881974  |
| P  | 3.701586  | 0.471619  | -1.370352 |
| C  | 4.060778  | -1.128255 | -1.278349 |
| O  | 4.325002  | -2.257257 | -1.212887 |
| C  | -1.381438 | -0.352472 | -0.122339 |
| N  | -1.958837 | 0.218983  | 0.952616  |
| C  | -3.333702 | 0.025411  | 0.946227  |
| C  | -3.615656 | -0.694810 | -0.166681 |
| N  | -2.399415 | -0.920834 | -0.800266 |
| C  | -1.161020 | 0.883293  | 1.994242  |
| C  | -1.577878 | 2.328460  | 2.223008  |
| C  | -2.172985 | -1.628950 | -2.065543 |
| C  | -2.760180 | -3.034710 | -2.074137 |
| C  | -4.939406 | -1.185188 | -0.642479 |
| C  | -4.283633 | 0.560359  | 1.961437  |
| C  | -2.605267 | -0.792756 | -3.262260 |
| C  | -1.101793 | 0.060023  | 3.273222  |
| H  | -0.159474 | 0.899763  | 1.577008  |
| H  | -1.090292 | -1.731035 | -2.115000 |
| H  | -5.736768 | -0.664762 | -0.115094 |



|   |           |           |           |
|---|-----------|-----------|-----------|
| H | -5.086635 | -1.004791 | -1.706809 |
| H | -5.066694 | -2.254485 | -0.464708 |
| H | -4.435816 | 1.634330  | 1.841272  |
| H | -5.250988 | 0.072656  | 1.856656  |
| H | -3.939554 | 0.384368  | 2.979098  |
| H | -2.324309 | -3.594190 | -2.902398 |
| H | -2.523760 | -3.559915 | -1.147958 |
| H | -3.841051 | -3.036237 | -2.210427 |
| H | -2.337841 | -1.307227 | -4.186072 |
| H | -3.681976 | -0.618589 | -3.275000 |
| H | -2.100450 | 0.173789  | -3.253888 |
| H | -0.379175 | 0.511099  | 3.954332  |
| H | -2.062441 | 0.016919  | 3.787787  |
| H | -0.769165 | -0.954986 | 3.059133  |
| H | -0.808279 | 2.825711  | 2.814041  |
| H | -1.663008 | 2.858660  | 1.274650  |
| H | -2.518708 | 2.411700  | 2.767283  |
| H | 2.906616  | 0.354998  | 1.670213  |
| H | 3.255508  | -0.778443 | 3.815634  |
| H | 2.114352  | -2.919191 | 4.295131  |
| H | 0.589026  | -3.898540 | 2.608224  |
| H | 0.159870  | -2.716385 | 0.502884  |
| H | 2.396329  | 2.274225  | 0.695362  |
| H | 1.886411  | 4.649774  | 0.989675  |
| H | -0.023400 | 5.675295  | -0.200120 |
| H | -1.439625 | 4.276961  | -1.674391 |
| H | -0.974579 | 1.882445  | -1.918752 |

**Table S8.** Bond length and Wiberg-bond index of characteristic bonds.

| Bond  | Bond lengths (Å) | Wiberg-bond index |
|-------|------------------|-------------------|
| N1-C1 | 1,347            | 1,28              |
| N2-C1 | 1,349            | 1,27              |
| C1-Sb | 2,638            | 0,32              |
| C2-O  | 1,161            | 1,87              |
| P-C2  | 1,642            | 1,82              |
| Sb-P  | 2,714            | 0,55              |

**Table S9.** Natural charges of main atoms.

| Atom or unit | Charge |
|--------------|--------|
| N1           | -0,38  |
| N2           | -0,37  |
| C1           | +0,17  |
| C2           | +0,27  |
| O            | -0,51  |
| P            | -0,23  |
| Sb           | +1,06  |
| Carbene      | +0,23  |

**Figure S25.** Chemical structure of NHC-C(O)PBiPh<sub>2</sub> complex with Cartesian X,Y,Z-coordinates (ωb97xd def2-TZVP).

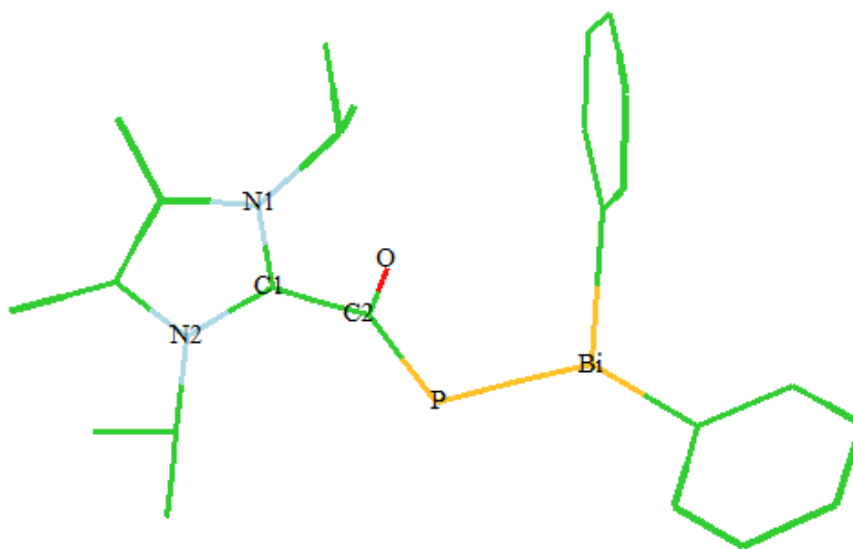

scf done: -1673.469611

|    |           |           |           |
|----|-----------|-----------|-----------|
| C  | 3.260243  | -1.908602 | 1.567785  |
| C  | 3.383675  | -0.921309 | 0.593476  |
| C  | 4.527893  | -0.125712 | 0.605012  |
| C  | 5.515454  | -0.303832 | 1.563709  |
| C  | 5.377302  | -1.291644 | 2.527371  |
| C  | 4.247540  | -2.094818 | 2.526444  |
| Bi | 1.837473  | -0.629560 | -1.036163 |
| C  | 1.577474  | 1.568592  | -0.572297 |
| C  | 1.154886  | 2.431517  | -1.579249 |
| C  | 0.942629  | 3.779490  | -1.320617 |
| C  | 1.146809  | 4.283264  | -0.044934 |
| C  | 1.562749  | 3.431276  | 0.969022  |
| C  | 1.773253  | 2.084679  | 0.706185  |
| P  | -0.154796 | -1.289772 | 0.500521  |
| C  | -1.247919 | -0.483447 | -0.592019 |
| O  | -1.096070 | 0.034751  | -1.714617 |
| C  | -2.620566 | -0.261024 | 0.003036  |
| N  | -3.633972 | -1.124702 | 0.063856  |
| C  | -4.729520 | -0.487726 | 0.634798  |
| C  | -4.346413 | 0.786917  | 0.905269  |
| N  | -3.024164 | 0.905784  | 0.504192  |
| C  | -3.506768 | -2.519784 | -0.397946 |
| C  | -4.569823 | -2.883832 | -1.423973 |
| C  | -2.141940 | 2.093226  | 0.525178  |
| C  | -2.050291 | 2.720654  | 1.906315  |
| C  | -5.137016 | 1.880118  | 1.533299  |

|   |           |           |           |
|---|-----------|-----------|-----------|
| C | -6.055851 | -1.125045 | 0.857520  |
| C | -2.531173 | 3.064896  | -0.577034 |
| C | -3.433006 | -3.481795 | 0.778014  |
| H | 0.972809  | 2.051935  | -2.578310 |
| H | 0.614849  | 4.436897  | -2.117471 |
| H | 0.987442  | 5.335699  | 0.157239  |
| H | 1.727831  | 3.817811  | 1.968140  |
| H | 2.094630  | 1.430908  | 1.509070  |
| H | 2.378736  | -2.540044 | 1.596650  |
| H | 4.129959  | -2.865942 | 3.278624  |
| H | 6.145783  | -1.432053 | 3.277648  |
| H | 6.393805  | 0.330808  | 1.558268  |
| H | 4.652865  | 0.659673  | -0.133858 |
| H | -2.537063 | -2.538548 | -0.894020 |
| H | -1.154423 | 1.699726  | 0.287819  |
| H | -6.196467 | 1.633519  | 1.505002  |
| H | -4.853479 | 2.033364  | 2.575585  |
| H | -5.007014 | 2.825242  | 1.008601  |
| H | -5.962802 | -2.100798 | 1.332025  |
| H | -6.658174 | -0.499786 | 1.513221  |
| H | -6.602998 | -1.255199 | -0.077323 |
| H | -1.809986 | 3.881456  | -0.593000 |
| H | -2.495032 | 2.562017  | -1.543136 |
| H | -3.526064 | 3.487746  | -0.425237 |
| H | -1.217426 | 3.423526  | 1.898791  |
| H | -2.949716 | 3.269629  | 2.184134  |
| H | -1.842423 | 1.962655  | 2.662253  |

H -4.278785 -3.814816 -1.910817  
H -5.548479 -3.043525 -0.972601  
H -4.652115 -2.113580 -2.191115  
H -3.226282 -4.485251 0.404504  
H -2.622857 -3.194687 1.448438  
H -4.367673 -3.520265 1.339024

**Table S10.** Bond length and Wiberg-bond index of characteristic bonds.

| Bond  | Bond lengths (Å) | Wiberg-bond index |
|-------|------------------|-------------------|
| N1-C1 | 1,332            | 1,30              |
| N2-C1 | 1,333            | 1,30              |
| C1-C2 | 1,513            | 0,93              |
| C2-O  | 1,246            | 1,47              |
| P-C2  | 1,743            | 1,42              |
| Bi-P  | 2,601            | 0,91              |

**Table S11.** Natural charges of main atoms.

| Atom or unit | Charge |
|--------------|--------|
| N1           | -0,29  |
| N2           | -0,29  |
| C1           | +0,41  |
| C2           | +0,04  |
| O            | -0,68  |
| P            | -0,24  |
| Bi           | +0,94  |
| Carbene      | +0,75  |

**Figure S26.** Chemical structure of NHC-C(O)PSbPh<sub>2</sub> complex with Cartesian X,Y,Z-coordinates (ωb97xd def2-TZVP).

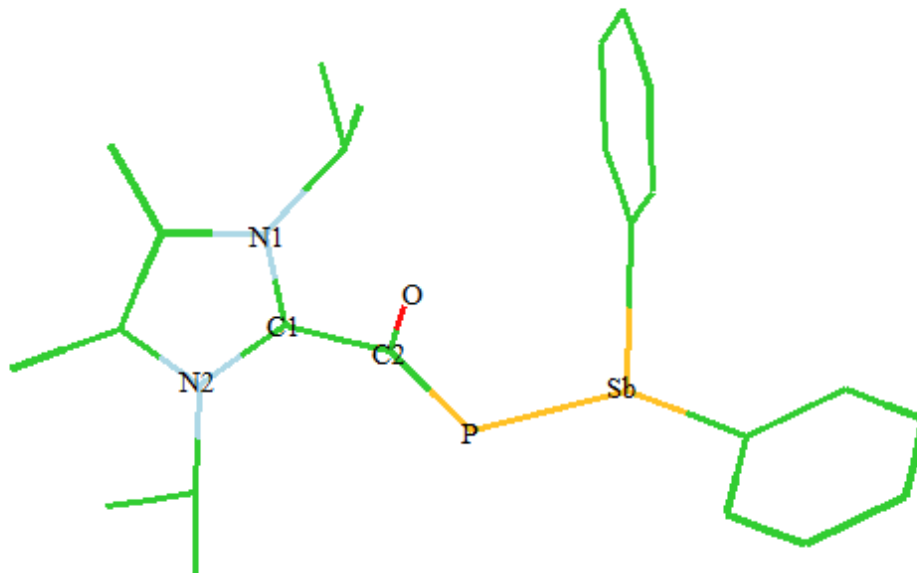

scf done: -1699.090604

|   |           |           |           |
|---|-----------|-----------|-----------|
| N | -3.410275 | -1.123139 | -0.019538 |
| C | -2.389142 | -0.268841 | -0.074650 |
| N | -2.763583 | 0.880526  | 0.486062  |
| C | -4.075218 | 0.759719  | 0.919726  |
| C | -4.481236 | -0.498599 | 0.608855  |
| C | -1.037944 | -0.477313 | -0.723585 |
| O | -0.916249 | 0.090641  | -1.823122 |
| C | -1.867377 | 2.057032  | 0.529138  |
| C | -2.267412 | 3.069538  | -0.531760 |
| C | -4.834692 | 1.837447  | 1.609665  |
| C | -5.806988 | -1.131756 | 0.845933  |

|    |           |           |           |
|----|-----------|-----------|-----------|
| C  | -3.315553 | -2.497742 | -0.547057 |
| C  | -3.214664 | -3.512429 | 0.581548  |
| P  | 0.081786  | -1.340085 | 0.298699  |
| Sb | 2.002378  | -0.677720 | -1.182969 |
| C  | 1.829187  | 1.421599  | -0.676097 |
| C  | 1.420207  | 2.328060  | -1.650123 |
| C  | 1.239713  | 3.670719  | -1.344189 |
| C  | 1.466173  | 4.126233  | -0.054356 |
| C  | 1.872564  | 3.231893  | 0.926603  |
| C  | 2.048525  | 1.891052  | 0.617535  |
| C  | 3.530503  | -1.082382 | 0.298215  |
| C  | 4.726599  | -0.367356 | 0.248390  |
| C  | 5.751898  | -0.621370 | 1.146850  |
| C  | 5.602655  | -1.608993 | 2.109523  |
| C  | 4.423344  | -2.334592 | 2.166873  |
| C  | 3.397000  | -2.071583 | 1.269423  |
| C  | -4.416951 | -2.801068 | -1.551850 |
| C  | -1.741931 | 2.638907  | 1.927519  |
| H  | 1.223935  | 1.984044  | -2.658882 |
| H  | 0.919911  | 4.361346  | -2.115461 |
| H  | 1.331735  | 5.174551  | 0.184290  |
| H  | 2.055857  | 3.580276  | 1.936415  |
| H  | 2.359815  | 1.202575  | 1.394640  |
| H  | 2.477334  | -2.641276 | 1.343131  |
| H  | 4.297175  | -3.105681 | 2.917525  |
| H  | 6.401163  | -1.810464 | 2.812949  |
| H  | 6.670357  | -0.049124 | 1.093764  |

|   |           |           |           |
|---|-----------|-----------|-----------|
| H | 4.862072  | 0.412503  | -0.494188 |
| H | -2.363321 | -2.505213 | -1.076376 |
| H | -0.889387 | 1.661136  | 0.259269  |
| H | -5.895920 | 1.597190  | 1.614897  |
| H | -4.510612 | 1.958600  | 2.644230  |
| H | -4.718350 | 2.796537  | 1.107249  |
| H | -5.709576 | -2.127213 | 1.276760  |
| H | -6.381953 | -0.528831 | 1.545656  |
| H | -6.384695 | -1.217033 | -0.075505 |
| H | -1.537232 | 3.878308  | -0.535555 |
| H | -2.257597 | 2.598610  | -1.514370 |
| H | -3.253957 | 3.497928  | -0.344646 |
| H | -0.898699 | 3.329417  | 1.926587  |
| H | -2.628244 | 3.191794  | 2.237871  |
| H | -1.532385 | 1.855502  | 2.656662  |
| H | -4.164754 | -3.722722 | -2.076666 |
| H | -5.385992 | -2.949592 | -1.076410 |
| H | -4.500986 | -2.004216 | -2.291138 |
| H | -3.036198 | -4.500596 | 0.156506  |
| H | -2.376977 | -3.266105 | 1.234177  |
| H | -4.129165 | -3.563151 | 1.174084  |

**Table S12.** Bond length and Wiberg-bond index of characteristic bonds.

| Bond  | Bond lengths (Å) | Wiberg-bond index |
|-------|------------------|-------------------|
| N1-C1 | 1,333            | 1,30              |
| N2-C1 | 1,333            | 1,30              |
| C1-C2 | 1,513            | 0,93              |
| C2-O  | 1,244            | 1,48              |
| P-C2  | 1,745            | 1,41              |
| Sb-P  | 2,515            | 0,92              |



**Table S13.** Natural charges of main atoms.

| Atom or unit | Charge |
|--------------|--------|
| N1           | -0,29  |
| N2           | -0,29  |
| C1           | +0,41  |
| C2           | +0,06  |
| O            | -0,67  |
| P            | -0,24  |
| Sb           | +0,90  |
| Carbene      | +0,76  |

## References

1. M. J. Frisch, G. W. T., H. B. Schlegel, G. E. Scuseria, M. A. Robb, J. R. Cheeseman, G. Scalmani, V. Barone, B. Mennucci, G. A. Petersson, H. Nakatsuji, M. Caricato, X. Li, H. P. Hratchian, A. F. Izmaylov, J. Bloino, G. Zheng, J. L. Sonnenberg, M. Hada, M. Ehara, K. Toyota, R. Fukuda, J. Hasegawa, M. Ishida, T. Nakajima, Y. Honda, O. Kitao, H. Nakai, T. Vreven, J. A. Montgomery, Jr., J. E. Peralta, F. Ogliaro, M. Bearpark, J. J. Heyd, E. Brothers, K. N. Kudin, V. N. Staroverov, R. Kobayashi, J. Normand, K. Raghavachari, A. Rendell, J. C. Burant, S. S. Iyengar, J. Tomasi, M. Cossi, N. Rega, J. M. Millam, M. Klene, J. E. Knox, J. B. Cross, V. Bakken, C. Adamo, J. Jaramillo, R. Gomperts, R. E. Stratmann, O. Yazyev, A. J. Austin, R. Cammi, C. Pomelli, J. W. Ochterski, R. L. Martin, K. Morokuma, V. G. Zakrzewski, G. A. Voth, P. Salvador, J. J. Dannenberg, S. Dapprich, A. D. Daniels, Ö. Farkas, J. B. Foresman, J. V. Ortiz, J. Cioslowski and D. J. Fox, Gaussian 09, Revision A.02, Gaussian 09, Revision A.02. *Gaussian Inc.*, Wallingford CT **2009**.
2. Glendening, E. D.; Reed, A. E.; Carpenter, J. E.; Bohmann, J. A.; Morales, C. M.; Weinhold, F., In NBO 5.0., Theoretical Chemistry Institute, University of Wisconsin, Madison, 2001.
